# Supplementary material for: The effect of alcohol dose on the development of hypertension in Asian and Western men: systematic review and meta-analysis
Source: PubMed Central journal article supplement — Korean J Intern Med. 2019 Dec 6;35(4):906–16. doi: 10.3904/kjim.2019.016 (PMC7373951; doi:10.3904/kjim.2019.016), 2019-12-06
Supplement: kjim-2019-016-suppl2.pdf [file kjim-2019-016-suppl2.pdf]

**Supplementary Table 2. Star system of the quality assessment used for the New-Castle Ottawa Scale and assigning colors**

| Star system of Newcastle-Ottawa Scale (cohort study) |                                                                             | Color assigned                                                                                                                                           |        |   |
|------------------------------------------------------|-----------------------------------------------------------------------------|----------------------------------------------------------------------------------------------------------------------------------------------------------|--------|---|
| Selection                                            | 1) Representativeness of the exposed cohort                                 | Ⓐ Truly representative of the average _____ (describe) in the community                                                                                  | a or b |   |
|                                                      |                                                                             | Ⓑ Somewhat representative of the average _____ in the community                                                                                          | c      |   |
|                                                      |                                                                             | Ⓒ Selected group of users, e.g., nurses, volunteers                                                                                                      | d      |   |
|                                                      |                                                                             | Ⓓ No description of the derivation of the cohort                                                                                                         |        |   |
|                                                      | 2) Selection of the nonexposed cohort                                       | Ⓐ Drawn from the same community as the exposed cohort                                                                                                    | a      |   |
|                                                      |                                                                             | Ⓑ Drawn from a different source                                                                                                                          | b      |   |
|                                                      |                                                                             | Ⓒ No description of the derivation of the nonexposed cohort                                                                                              | c      |   |
|                                                      | 3) Ascertainment of exposure                                                | Ⓐ Secure record (e.g., surgical records)                                                                                                                 | a or b |   |
|                                                      |                                                                             | Ⓑ Structured interview                                                                                                                                   | c      |   |
|                                                      |                                                                             | Ⓒ Written self report                                                                                                                                    | d      |   |
|                                                      |                                                                             | Ⓓ No description                                                                                                                                         |        |   |
|                                                      | 4) Demonstration that outcome of interest was not present at start of study | Ⓐ Yes                                                                                                                                                    | a      |   |
|                                                      |                                                                             | Ⓑ No                                                                                                                                                     | -      |   |
|                                                      | Comparability                                                               | 1) Study controls for _____ (select the most important factor)                                                                                           | Ⓐ Yes  | a |
|                                                      |                                                                             |                                                                                                                                                          | Ⓑ No   | - |
|                                                      |                                                                             | 2) Study controls for any additional factor                                                                                                              | Ⓐ Yes  | b |
| Ⓑ No                                                 |                                                                             |                                                                                                                                                          | a      |   |
|                                                      |                                                                             |                                                                                                                                                          | -      |   |
|                                                      |                                                                             |                                                                                                                                                          | b      |   |
| Outcome                                              | 1) Assessment of outcome                                                    | Ⓐ Independent blind assessment                                                                                                                           | a or b |   |
|                                                      |                                                                             | Ⓑ Record linkage                                                                                                                                         | c      |   |
|                                                      |                                                                             | Ⓒ Self report                                                                                                                                            | d      |   |
|                                                      |                                                                             | Ⓓ No description                                                                                                                                         |        |   |
|                                                      | 2) Was follow-up long enough for outcomes to occur                          | Ⓐ Yes (select an adequate follow-up period for the outcome of interest)                                                                                  | a      |   |
|                                                      |                                                                             | Ⓑ No                                                                                                                                                     | -      |   |
|                                                      | 3) Adequacy of follow-up of cohorts                                         | Ⓐ Complete follow-up: all subjects accounted for                                                                                                         | b      |   |
|                                                      |                                                                             | Ⓑ Subjects lost to follow up unlikely to introduce bias: small number lost → 10% (select an adequate %) follow-up, or description provided of those lost | a or b |   |
|                                                      |                                                                             | Ⓒ Follow-up rate < 30% (select an adequate %) and no description of those lost                                                                           | c      |   |
|                                                      |                                                                             | Ⓓ No statement                                                                                                                                           | d      |   |
|                                                      |                                                                             |                                                                                                                                                          |        |   |
|                                                      |                                                                             |                                                                                                                                                          |        |   |
