# Supplementary material for: The effect of alcohol dose on the development of hypertension in Asian and Western men: systematic review and meta-analysis
Source: PubMed Central journal article supplement — Korean J Intern Med. 2019 Dec 6;35(4):906–16. doi: 10.3904/kjim.2019.016 (PMC7373951; doi:10.3904/kjim.2019.016), 2019-12-06
Supplement: kjim-2019-016-suppl3.pdf [file kjim-2019-016-suppl3.pdf]

**Supplementary Table 3. Studies that were excluded from the current meta-analysis**

| Study                       | Reasons for exclusion                                                                                                                                                                                                                               |
|-----------------------------|-----------------------------------------------------------------------------------------------------------------------------------------------------------------------------------------------------------------------------------------------------|
| Sesso et al. (2008) [27]    | Wrong reference group: It includes rarely drinkers.                                                                                                                                                                                                 |
| Tsuruta et al. (2000) [28]  | Wrong reference group: It includes rarely drinkers (0–3 g/day).                                                                                                                                                                                     |
| Stranges et al. (2004) [29] | Wrong reference group: Lifetime abstainers were defined as participants who reported a consumption of < 12 drinks during their lifetime or in any 1-year period.                                                                                    |
| Yamada et al. (1991) [30]   | Wrong comparison: Two groups, subjects with or without an elevated serum r-glutamyl transpeptidase, were compared;<br>Unavailable to assess the effect size in the form of relative risks (or odds ratio/hazard ratio) and 95% confidence intervals |
| Curtis et al. (1997) [31]   | Wrong outcome: Hypertension was defined as a blood pressure $\geq$ 160/95 mmHg or taking anti-hypertensive medications.                                                                                                                             |
