# Supplementary material for: The effect of alcohol dose on the development of hypertension in Asian and Western men: systematic review and meta-analysis
Source: PubMed Central journal article supplement — Korean J Intern Med. 2019 Dec 6;35(4):906–16. doi: 10.3904/kjim.2019.016 (PMC7373951; doi:10.3904/kjim.2019.016), 2019-12-06
Supplement: kjim-2019-016-suppl4.pdf [file kjim-2019-016-suppl4.pdf]

**Supplementary Table 4. Subgroup analysis of the incidence of hypertension by age group among Asian men**

| Alcohol consumption, g/day | Age group, yr | No. of studies | $I^2$ , % ( $p$ for heterogeneity) | RR <sup>a</sup> (95% CI)      | $p$ for subgroup difference |
|----------------------------|---------------|----------------|------------------------------------|-------------------------------|-----------------------------|
| 0.01–20.0                  | –35           | 1              | -                                  | 1.28 (0.76–2.16)              | 0.94                        |
|                            | 36+           | 4              | 44 (0.15)                          | 1.31 (1.06–1.61)              |                             |
| 20.1–40.0                  | –35           | 1              | -                                  | 2.08 (1.24–3.49)              | 0.32 (0.18 <sup>b</sup> )   |
|                            | 36+           | 5              | 67 (0.02)                          | 1.56 (1.26–1.93)              |                             |
|                            |               | 4 <sup>c</sup> | 49 (0.12)                          | 1.43 (1.21–1.69) <sup>b</sup> |                             |
| 40.1–60.0                  | –35           | 1              | -                                  | 2.45 (1.35–4.45)              | 0.35 (0.54 <sup>b</sup> )   |
|                            | 36+           | 5              | 66 (0.02)                          | 1.81 (1.44–2.26)              |                             |
|                            |               | 4 <sup>d</sup> | 0 (0.79)                           | 2.01 (1.66–2.44) <sup>b</sup> |                             |

RR, relative risk; CI, confidence interval.

<sup>a</sup>Generic inverse variance method, random effect model.

<sup>b</sup>Sensitivity analysis.

<sup>c</sup>Sensitivity analysis, a repeat of the primary analysis without an effect estimate from Ohmori et al. [13].

<sup>d</sup>Sensitivity analysis, a repeat of the primary analysis without an effect estimate from Okubo et al. [14].
