# Supplementary material for: The effect of alcohol dose on the development of hypertension in Asian and Western men: systematic review and meta-analysis
Source: PubMed Central journal article supplement — Korean J Intern Med. 2019 Dec 6;35(4):906–16. doi: 10.3904/kjim.2019.016 (PMC7373951; doi:10.3904/kjim.2019.016), 2019-12-06
Supplement: kjim-2019-016-suppl5.pdf [file kjim-2019-016-suppl5.pdf]

|                 | Selection1_exposed cohort representativeness | Selection2_exposed cohort selection | Selection3_exposure ascertainment | Selection4_no interest outcome at start | Comprability1_study controls imprtant factor | Comprability2_study controls additional factor | Outcome1_outcome assessment | Outcome2_long enough follow-up | Outcome3_adequacy of follow-up |
|-----------------|----------------------------------------------|-------------------------------------|-----------------------------------|-----------------------------------------|----------------------------------------------|------------------------------------------------|-----------------------------|--------------------------------|--------------------------------|
| Diederichs 2017 | +                                            | +                                   | +                                 | +                                       | +                                            | +                                              | +                           | +                              | ?                              |
| Fuchs 2001      | +                                            | +                                   | ?                                 | +                                       | +                                            | +                                              | +                           | +                              | +                              |
| Halanych 2010   | +                                            | +                                   | +                                 | +                                       | +                                            | +                                              | +                           | +                              | +                              |
| Nakanishi 1998  | ?                                            | +                                   | ?                                 | +                                       | +                                            | +                                              | +                           | +                              | +                              |
| Nakanishi 2001  | ?                                            | +                                   | ?                                 | +                                       | +                                            | +                                              | +                           | +                              | +                              |
| Nakanishi 2002  | ?                                            | +                                   | ?                                 | +                                       | +                                            | +                                              | +                           | +                              | +                              |
| Ohmori 2002     | +                                            | +                                   | ?                                 | +                                       | +                                            | +                                              | +                           | +                              | +                              |
| Okubo 2014      | +                                            | +                                   | ?                                 | +                                       | +                                            | +                                              | +                           | +                              | +                              |
| Peng 2013       | ?                                            | +                                   | ?                                 | +                                       | +                                            | +                                              | +                           | +                              | +                              |
| Saremi 2004     | +                                            | +                                   | ?                                 | +                                       | +                                            | +                                              | +                           | +                              | +                              |

**Supplementary Figure 1.** Summary of the quality assessment in non-randomized studies: review the authors' judgement about each assessment item for 10 cohort studies.
