# Supplementary material for: The effect of alcohol dose on the development of hypertension in Asian and Western men: systematic review and meta-analysis
Source: PubMed Central journal article supplement — Korean J Intern Med. 2019 Dec 6;35(4):906–16. doi: 10.3904/kjim.2019.016 (PMC7373951; doi:10.3904/kjim.2019.016), 2019-12-06
Supplement: kjim-2019-016-suppl9.pdf [file kjim-2019-016-suppl9.pdf]

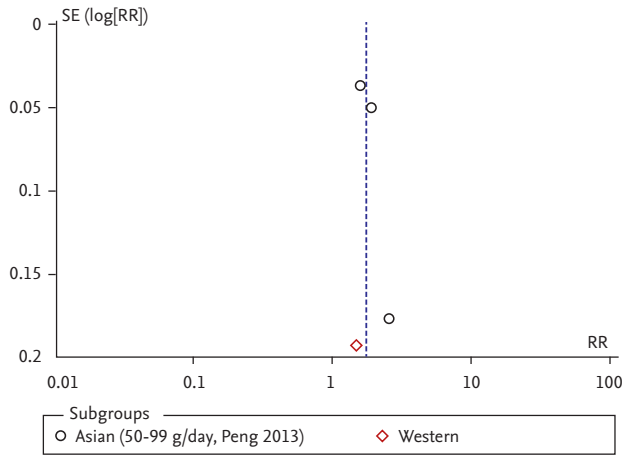

**Supplementary Figure 5.** Funnel plot for the studies regarding high dose alcohol at baseline in men. SE, standard error; RR, relative risk.
